# Supplementary material for: Parallel Faster-X Evolution of Gene Expression and Protein Sequences in Drosophila: Beyond Differences in Expression Properties and Protein Interactions
Source: PubMed Central journal article supplement (PMC4366066; doi:10.1371/journal.pone.0116829), 2015-03-19

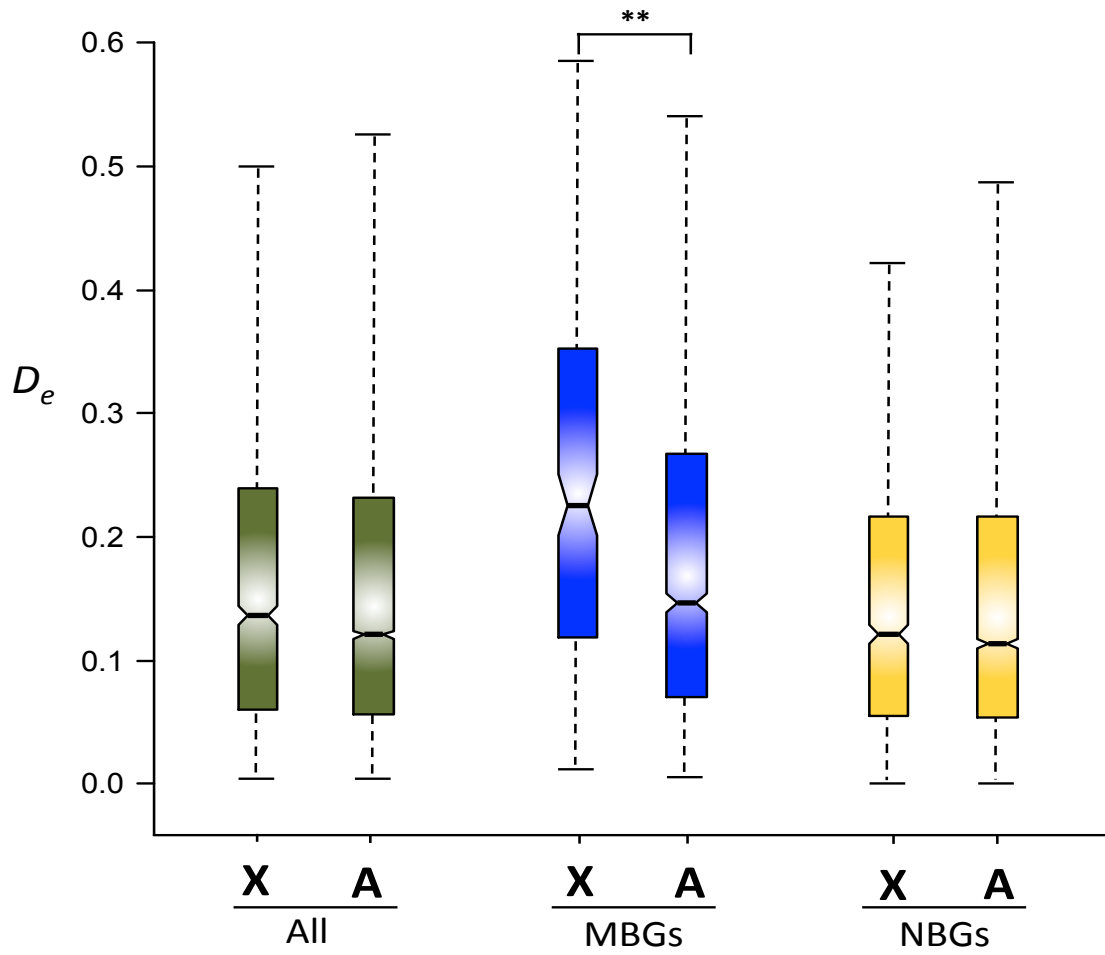

Supplement: pone.0116829.s001.pdf [file pone.0116829.s001.pdf]
